# Supplementary material for: The Mouse Universal Genotyping Array: From Substrains to Subspecies
Source: PubMed Central journal article supplement (PMC4751547; doi:10.1534/g3.115.022087), 2015-12-18

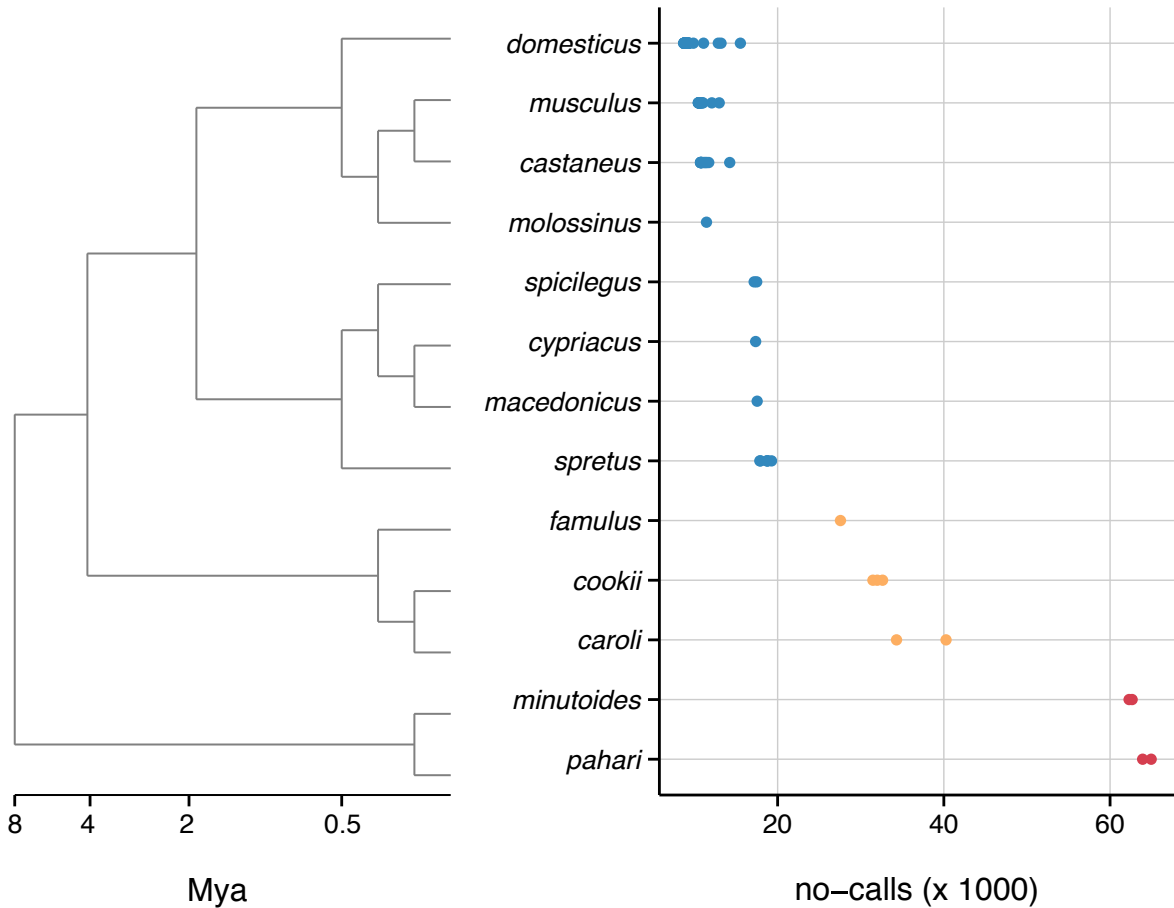

Supplement: supp_g3.115.022087_FigureS1.pdf [file supp_g3.115.022087_FigureS1.pdf]
