# Supplementary material for: The Mouse Universal Genotyping Array: From Substrains to Subspecies
Source: PubMed Central journal article supplement (PMC4751547; doi:10.1534/g3.115.022087), 2015-12-18

**A**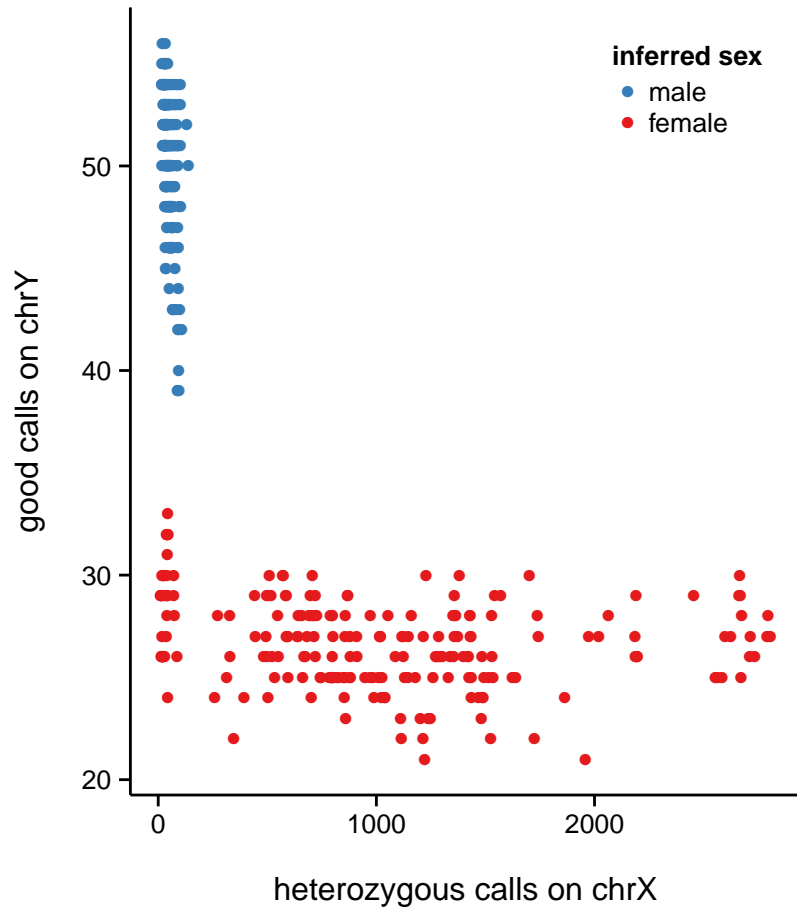**B**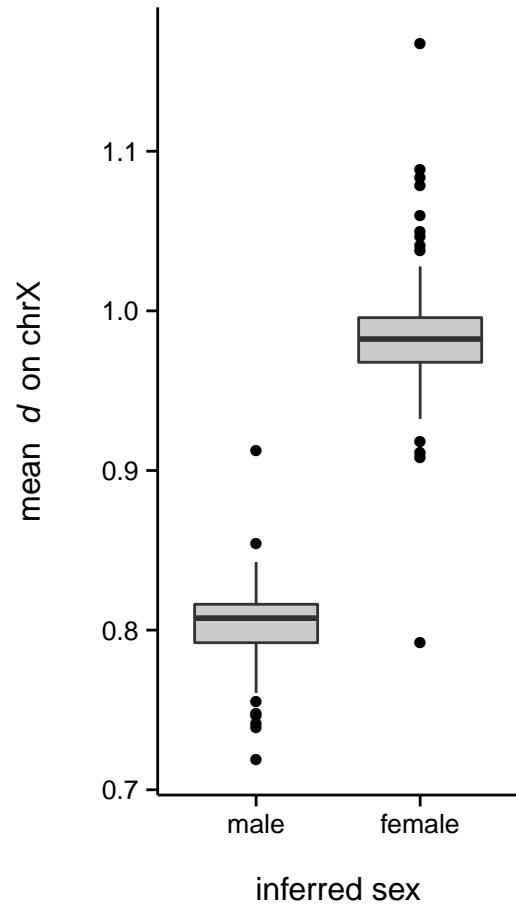

Supplement: supp_g3.115.022087_FigureS2.pdf [file supp_g3.115.022087_FigureS2.pdf]
